# Supplementary material
Source: Research Square preprint supplement (doi:10.21203/rs.3.rs-8289177/v1)
Supplement: Supplementary file 1 [file a7fb7c5936c93a12f7f94b04.docx]

**Supplementary Digital Content 3 – Non-responder analysis**

A non-responder analysis was conducted to assess whether survey data were missing completely at random (MCAR). The analysis compared baseline characteristics between patients who completed the cross-sectional survey (responders) and those who did not (non-responders). P-values <0.05 were considered statistically significant. No significant differences were found between responders and non-responders across any measured characteristic, indicating that data were missing completely at random and that survey non-response did not introduce systematic bias into the study results. Little’s Test showed the data was MCAR (p=0.322).

| **Supplementary Digital Content 3. Responder and Non-Responder Analysis** | | | |
| --- | --- | --- | --- |
| **Characteristic** | **Survey non-responders (n=162 (50.9%))** | **Survey Responders (n=156 (49.1%))** | **P-Value** |
| **Demographic characteristics** | | | |
| Sex, female | 47 (29.0) | 63 (40.4) | 0.094 |
| Age at ICAN surgery (years) | 51.1 (38.0-62.8) | 56.4 (42.4-65.1) | 0.063 |
| Body Mass Index (kg/m²) | 27.8 (23.0-32.5) | 27.8 (23.9-32.6) | 0.557 |
| **Race/Ethnicity** |  |  | 0.403 |
| African American or Black | 15 (9.3) | 9 (5.8) |  |
| Asian | 2 (1.2) | 3 (1.9) |  |
| Latin (Hispanic) | 10 (6.2) | 5 (3.2) |  |
| Middle Eastern (Arab) | 5 (3.1) | 2 (1.3) |  |
| Native American or Alaska Native | 1 (0.6) | 0 (0.0) |  |
| Other | 2 (1.2) | 1 (0.6) |  |
| White | 127 (78.4) | 136 (87.2) |  |
| **Insurance type** |  |  | 0.126 |
| government-sponsored | 17 (10.5) | 7 (4.5) |  |
| private | 131 (80.9) | 130 (83.3) |  |
| self-pay/uninsured | 5 (3.1) | 10 (6.4) |  |
| workers' compensation | 9 (5.6) | 9 (5.8) |  |
| **Comorbidity characteristics** | | | |
| Alcoholism | 15 (9.3) | 11 (7.1) | 0.191 |
| Smoking | 54 (33.3) | 28 (17.9) | 0.053 |
| Diabetes | 50 (30.9) | 46 (29.5) | 0.885 |
| Hypothyroidism | 15 (9.3) | 31 (19.9) | 0.011 |
| Psychiatric comorbidity | 111 (68.5) | 91 (58.3) | 0.077 |
| Depression | 83 (51.2) | 64 (41.0) | 0.087 |
| Anxiety disorder | 92 (56.8) | 71 (45.5) | 0.058 |
| Personality disorder | 9 (5.6) | 7 (4.5) | 0.858 |
| Post-traumatic stress disorder | 27 (16.7) | 19 (12.2) | 0.328 |
| Peripheral vascular disease | 49 (30.2) | 39 (25.0) | 0.357 |
| Chronic kidney disease | 17 (10.5) | 15 (9.6) | 0.941 |
| History of chronic pain | 130 (80.2) | 124 (79.5) | 0.977 |
| Complex regional pain syndrome | 7 (4.3) | 14 (9.0) | 0.149 |
| Elixhauser comorbidity index | 5.0 (2.3-8.0) | 4.0 (2.0-6.0) | 0.083 |
| Pre-operative opioid use | 125 (77.2) | 115 (73.7) | 0.560 |
| Post-operative opioid use | 80 (49.4) | 69 (44.5) | 0.450 |
| Pre-operative neuropathic pain medication | 134 (82.7) | 127 (81.4) | 0.875 |
| Post-operative neuropathic pain medication | 97 (59.9) | 86 (55.1) | 0.458 |
| **Surgery characteristics** | | | |
| **Laterality** |  |  | 0.985 |
| Bilateral | 6 (3.1) | 5 (2.6) |  |
| Left | 83 (51.2) | 78 (50.0) |  |
| Right | 73 (45.1) | 73 (46.8) |  |
| Upper Extremity | 17 (10.5) | 13 (8.3) | 0.640 |
| **Amputation level** |  |  | 0.734 |
| Forequarter (arm/scapula/clavicula) | 1 (0.6) | 0 (0.0) |  |
| Hip disarticulation | 1 (0.6) | 3 (1.9) |  |
| Knee disarticulation | 1 (0.6) | 1 (0.6) |  |
| Partial foot | 1 (0.6) | 2 (1.3) |  |
| Partial hand | 2 (1.2) | 4 (2.6) |  |
| Shoulder disarticulation | 1 (0.6) | 0 (0.0) |  |
| Tibial Turn up | 0 (0.0) | 1 (0.6) |  |
| Transfemoral | 46 (28.4) | 42 (26.9) |  |
| Transhumeral | 9 (5.6) | 5 (3.2) |  |
| Transradial | 8 (4.9) | 5 (3.2) |  |
| Transtibial | 92 (56.8) | 93 (59.6) |  |
| **Amputation indication** |  |  | 0.561 |
| Congenital Deformity | 2 (1.2) | 2 (1.3) |  |
| Infection or Sepsis | 45 (27.8) | 35 (22.4) |  |
| Malignancy | 20 (12.3) | 21 (13.5) |  |
| Other | 12 (7.4) | 10 (6.4) |  |
| Pain | 4 (2.5) | 10 (6.4) |  |
| Peripheral Vascular Disease | 11 (6.8) | 7 (4.5) |  |
| Trauma | 68 (42.0) | 71 (45.5) |  |
| Length of hospital stay (days) | 4.0 [1.0, 8.0] | 3.0 [1.0, 6.0] | 0.189 |
| TMR Surgery | 152 (93.8) | 152 (97.4) | 0.195 |
| RPNI Surgery | 52 (32.1) | 41 (26.3) | 0.309 |
| TMR Timing, Secondary | 81 (50.0) | 77 (49.7) | 0.999 |
| Follow-up (Years) | 1.07 [0.27, 2.66] | 1.45 [0.45, 2.72] | 0.229 |
| Time from Amputation to TMR (years) | 0.07 [0.00, 3.84] | 0.03 [0.00, 5.99] | 0.405 |
| Age at Amputation (years) | 48.0 [31.6, 60.8] | 50.4 [37.6, 62.8] | 0.261 |
| **Referral characteristics** | | | |
| **Referring Institution Type** |  |  | 0.416 |
| Academic Medical Center | 119 (73.5) | 107 (68.6) |  |
| Community Health Center | 0 (0.0) | 1 (0.6) |  |
| Community Hospital | 13 (8.0) | 25 (16.0) |  |
| International Facility | 4 (2.5) | 2 (1.3) |  |
| Not Specified | 14 (8.6) | 10 (6.4) |  |
| Rehabilitation Center | 3 (1.9) | 2 (1.3) |  |
| Specialized Center | 7 (4.3) | 6 (3.8) |  |
| Veterans Affairs Center | 2 (1.2) | 3 (1.9) |  |
| **Referring Department Type** |  |  | 0.623 |
| Burn Surgery | 1 (0.6) | 1 (0.6) |  |
| Emergency Medicine | 4 (2.5) | 3 (1.9) |  |
| General Surgery | 3 (1.9) | 1 (0.6) |  |
| Infectious Disease | 0 (0.0) | 1 (0.6) |  |
| Internal Medicine | 2 (1.2) | 1 (0.6) |  |
| Neurosurgery | 1 (0.6) | 0 (0.0) |  |
| Not Specified | 32 (19.8) | 36 (23.1) |  |
| Orthopaedic-Foot and Ankle | 10 (6.2) | 16 (10.3) |  |
| Orthopaedic-General | 12 (7.4) | 9 (5.8) |  |
| Orthopaedic-Hand and Upper Extremity | 5 (3.1) | 1 (0.6) |  |
| Orthopaedic-Joint Reconstruction | 4 (2.5) | 3 (1.9) |  |
| Orthopaedic-Oncology | 19 (11.7) | 22 (14.1) |  |
| Orthopaedic-Sports Medicine | 0 (0.0) | 1 (0.6) |  |
| Orthopaedic-Trauma | 23 (14.2) | 22 (14.1) |  |
| Orthotics/Prosthetics | 2 (1.2) | 3 (1.9) |  |
| Pain Management | 2 (1.2) | 2 (1.3) |  |
| Plastic and Reconstructive Surgery | 7 (4.3) | 9 (5.8) |  |
| Podiatry | 5 (3.1) | 2 (1.3) |  |
| Primary Care | 0 (0.0) | 4 (2.6) |  |
| Rehabilitation Medicine | 9 (5.6) | 10 (6.4) |  |
| Specialized Orthopaedic Surgery | 2 (1.2) | 0 (0.0) |  |
| Surgical Oncology | 2 (1.2) | 1 (0.6) |  |
| Trauma Surgery | 4 (2.5) | 2 (1.3) |  |
| Vascular Surgery | 12 (7.4) | 6 (3.8) |  |
| Wound Care | 1 (0.6) | 0 (0.0) |  |
| **Discharge Disposition** |  |  | 0.091 |
| End-of-Life Care | 1 (0.6) | 0 (0.0) |  |
| Expired | 1 (0.6) | 0 (0.0) |  |
| Facility-based Care | 26 (16.0) | 16 (10.3) |  |
| Home-based Care | 75 (46.3) | 102 (65.4) |  |
| Not Specified | 13 (8.0) | 3 (1.9) |  |
| Other | 1 (0.6) | 0 (0.0) |  |
| Spaulding Rehabilitation Hospital | 45 (27.8) | 35 (22.4) |  |
