# Supplementary material
Source: Research Square preprint supplement (doi:10.21203/rs.3.rs-8289177/v1)
Supplement: Supplementary file 2 [file eec93a75f63f7d02394a2f7f.docx]

**Supplementary Digital Content 2 –** Exploratory Bivariate Analysis of Factors Associated with Patient Dissatisfaction at the ICAN Clinic

| Factors Associated with Patient Dissatisfaction in the ICAN Clinic | |  |  |
| --- | --- | --- | --- |
| **Characteristic** | **Satisfied** | **Dissatisfied** | **P value** |
| Sex (Female vs Male) | 57 (90.5%) / 78 (83.9%) | 6 (9.5%) / 15 (16.1%) | 0.339 |
| Bilat (Unilateral vs Bilateral) | 130 (86.7%) / 4 (83.3%) | 20 (13.3%) / 1 (16.7%) | 0.586 |
| Diabetes (No vs Yes) | 95 (86.4%) / 40 (87.0%) | 15 (13.6%) / 6 (13.0%) | 1.000 |
| Hypothyroidism (No vs Yes) | 109 (87.2%) / 26 (83.9%) | 16 (12.8%) / 5 (16.1%) | 0.570 |
| PVD (No vs Yes) | 101 (86.3%) / 34 (87.2%) | 16 (13.7%) / 5 (12.8%) | 1.000 |
| CKD (No vs Yes) | 122 (86.5%) / 13 (86.7%) | 19 (13.5%) / 2 (13.3%) | 1.000 |
| History of Chronic Pain (No vs Yes) | 28 (87.5%) / 107 (86.3%) | 4 (12.5%) / 17 (13.7%) | 1.000 |
| CRPS (No vs Yes) | 121 (85.2%) / 14 (100.0%) | 21 (14.8%) / 0 (0.0%) | 0.218 |
| Psychiatric Comorbidity (No vs Yes) | 56 (86.2%) / 79 (86.8%) | 9 (13.8%) / 12 (13.2%) | 1.000 |
| Depression (No vs Yes) | 81 (88.0%) / 54 (84.4%) | 11 (12.0%) / 10 (15.6%) | 0.634 |
| Anxiety (No vs Yes) | 79 (92.9%) / 56 (78.9%) | 6 (7.1%) / 15 (21.1%) | 0.017* |
| Pers Disorder (No vs Yes) | 129 (86.6%) / 6 (85.7%) | 20 (13.4%) / 1 (14.3%) | 1.000 |
| PTSD (No vs Yes) | 119 (86.9%) / 16 (84.2%) | 18 (13.1%) / 3 (15.8%) | 0.723 |
| Opioid Use Preop (No vs Yes) | 36 (87.8%) / 99 (86.1%) | 5 (12.2%) / 16 (13.9%) | 1.000 |
| Opioid Use Postop (No vs Yes) | 76 (88.4%) / 58 (84.1%) | 10 (11.6%) / 11 (15.9%) | 0.484 |
| Neuromodulator medication (No vs Yes) | 26 (89.7%) / 109 (85.8%) | 3 (10.3%) / 18 (14.2%) | 0.767 |
| Neuromodulator medication (No vs Yes) | 63 (90.0%) / 72 (83.7%) | 7 (10.0%) / 14 (16.3%) | 0.346 |
| BMI | 29.0 (7.2) | 29.3 (6.9) | 0.888 |
| Age at Surgery | 54.3 (14.3) | 57.1 (15.1) | 0.422 |
| Timing of TMR/RPNI surgery (Primary vs Secondary) | 69 (88.5%) / 65 (84.4%) | 9 (11.5%) / 12 (15.6%) | 0.490 |

* indicates statistical significance (p<0.05)

Analysis of demographic, clinical, and surgical factors potentially associated with patient dissatisfaction. Only anxiety showed a statistically significant association (p=0.017). Abbreviations: PVD, peripheral vascular disease; CKD, chronic kidney disease; CRPS, complex regional pain syndrome; PTSD, post-traumatic stress disorder; BMI, body mass index
